# Supplementary material for: LeoA, B and C from Enterotoxigenic Escherichia coli (ETEC) Are Bacterial Dynamins
Source: PubMed Central journal article supplement (PMC4159319; doi:10.1371/journal.pone.0107211), 2014-09-09
Supplement: pone.0107211.s001.pdf [file pone.0107211.s001.pdf]

**Supporting Information File (S1)**

**LeoA, B and C from enterotoxigenic  
*Escherichia coli* (EPEC) are bacterial dynamins**

**Katharine A Michie, Anders Boysen, Harry H. Low,  
Jakob Møller-Jensen and Jan Löwe**

## Supporting Methods

### *Equilibrium Dialysis*

70  $\mu$ l LeoA-His<sub>6</sub> (180, 50, 10, 5, 1 and 0.5  $\mu$ M) in 25 mM Tris, 1 mM EDTA, 1 mM NaN<sub>3</sub>, 300 mM NaCl, pH 8.5 was dialysed in DispoEquilibrium dialysis cassettes (MWCO 10 kDa, Harvard Apparatus Holliston MA) against 100 nM [ $\alpha$ -<sup>32</sup>P] GTP in 25 mM Tris, 1 mM EDTA, 1 mM NaN<sub>3</sub>, 300 mM NaCl, 200 nM MgCl<sub>2</sub>, pH 8.5. Samples were left to equilibrate at room temperature for 42 hrs. Blank samples without protein were used to assess when equilibrium had been achieved. 10  $\mu$ l aliquots in triplicate of each chamber were added to scintillant and counted on a Beckman LS 6000 Series liquid scintillation system. DPM were calculated from 10 minute counts of each sample.

### *Filter Binding Assay*

LeoA-His<sub>6</sub> (100 and 200  $\mu$ M) was incubated with 0.9 mM [ $\alpha$ -<sup>32</sup>P] GTP in working buffer (25 mM Tris, 1 mM EDTA, 1 mM NaN<sub>3</sub>, 150 mM NaCl, 1.8 mM MgCl<sub>2</sub>, pH 8.5) for 10 minutes at 4°C. Triplicate 10  $\mu$ l aliquots of each reaction were rapidly filtered by vacuum through nitrocellulose membrane that had been pre-equilibrated in cold working buffer. The filter was washed with 100  $\mu$ l of cold working buffer three times, and the filter was added to scintillant and counted on a Beckman LS 6000 Series liquid scintillation system. Disintegrations per minute (DPM) were calculated from 10 minute counts of each sample and used to determine the number of nanomoles of GTP bound to the protein sample. *Methanococcus jannaschii* FtsZ (26 and 13  $\mu$ M) was used as a positive control. Solutions of working buffer and GTP only were used to determine background retention of the radio-labelled nucleotide.

### *GTPase assay*

GTP hydrolysis was assessed using a PiColorlock ALS assay from Innova Biosciences, Cambridge as described by the manufacturers instructions. LeoA-His<sub>6</sub> at 2.5  $\mu$ M (in 25 mM Tris, 150 mM NaCl, 1 mM EDTA, 1 mM NaN<sub>3</sub>, 2 mM MgCl<sub>2</sub>) was incubated at room temperature with 1 mM GTP. Samples were assayed at 5, 10, 20, 30, 40 and 50 minutes, by withdrawing 50  $\mu$ l of the reaction and adding 200  $\mu$ l of the ALS mix and incubating on ice. Absorbance at 632 nm was used to determine the free phosphate ions released. A phosphate standard curve was prepared using sodium

phosphate. The reaction was normalised including a control without LeoA-His<sub>6</sub>.

**Figure S1.** Annotated putative *leoABC* operon.

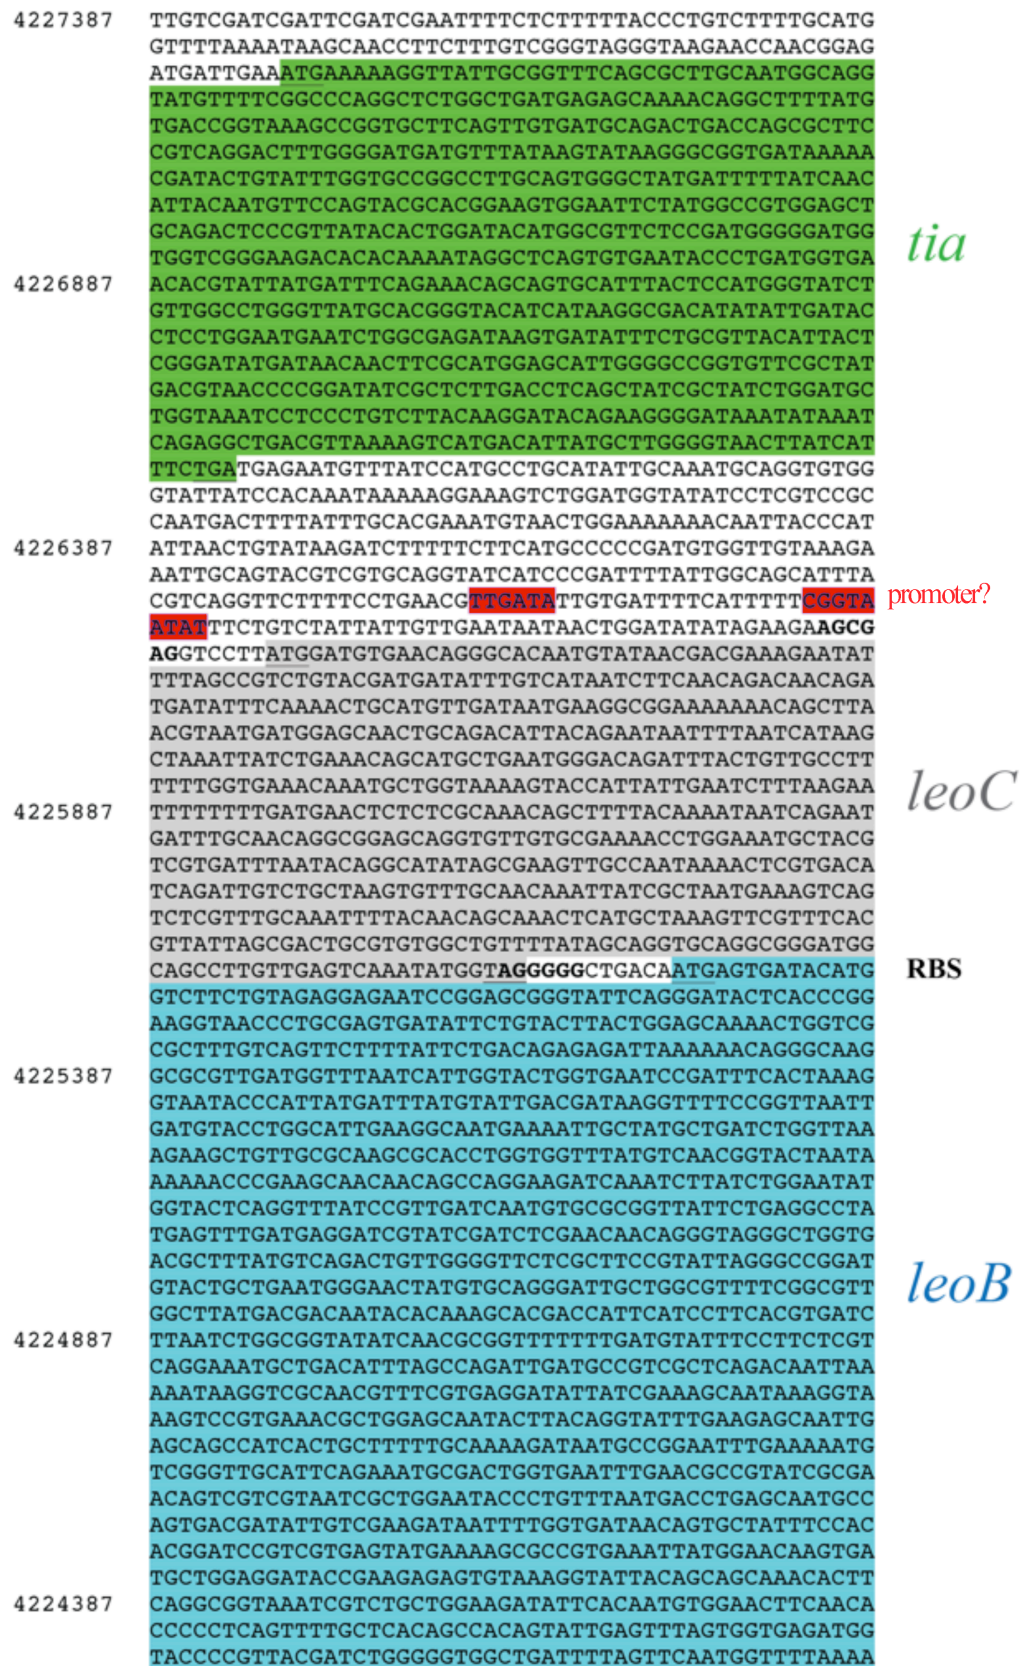



4223887 GTTGGCAGCTATGCCATGTCAGGCAGTGCATTGGCAGCATCTTTCCCGT  
TATTGGTACGCTCGTTGGCTCTGTGCTTGGCGCGCTGGTCGGCATAATAA  
TGACCGTTGCAGGTATTTTACCAGTAAAGCGTCAAAAATACGCAAAGCA  
CAAGGAAAAGTACGCGACAGGCTGGAAGAGGCGGGGATAAATCTCTCGA  
CAGCGTTGCCGATGAAACCCGCTCCTGGTTGCTGCTATTGAAAAAGAAC  
TTGAGAGTGGGCTGCTGCAAAAAGTCAACGATATGCAGGTGGCTCTGCAA  
CAGTCTGTTGCCATTTTCGAAAACACAAATCAGTCAAATCACAACATTA  
AAAACAAC**TGGAGGGCA**TCGCTTATGGAA**CAATTCAAACAGTTCAGTATT**  
**GAAAAACAGGCTGCATTAACTCGCTATTACAGTTGCGCGGAATGTTAGA**  
**AATGCTGGGAGAGATGGGGATAAACATCAGCGACGATTTACAAAAAGTCA**  
**CTTCTGCAATTAATGCCATCGAATCTGATGTCCTGCGTATTGCTCTGTTG**  
**GGGGCGTTCTCCGATGGCAAAACAGCGTTATCGCCGCATGGCTGGGTAA**  
**AGTAATGGATGATATGAATATTTCCATGGATGAGTCTCCGATCGGTTGA**  
**GTATTTACAAACCGGAAGTCTGCCAGATCAGTGTGAAATTGTTGATACG**  
**CCCGGGCTGTTTGGTGATAAAGAGCGCAGGTGGACGGGACTGGTGAT**  
**GTATGAAGACCTGACCAGACGCTATATATCTGAAGCACACCTGATTTTTT**  
ACGTGGTTGATGCCACGAACCCGCTCAAGGAGAGCCACAGCGACATCGTA  
4223387 AAATGGGTATTGCGCGATTGAATAAACTTTCTTCAACCATCTTTGTTAT  
CAATAAAATGGATGAAGTGACCAGCTGACAGATCAGGCACTGTTTGACG  
AGCAGGCGGCAATTA AAAAGGCGAATCTGAAAGGCAAAATGCAACGTGCA  
GCGGATCTTACCGCTCAGGAGTGTGAGCAGCTAAATATCGTCTGCGTCGC  
CTCAAACCCAAATGGTTCGGGCTTAACGTACTGGTTTACTAAACCCGAAC  
ATTACGAAAGTCTTTCGGCATTAAACGATCTTAAAAATGCTGCCACCGAA  
ATACTGAAAAC**TAATGTGCCAGAGGCTTGTGGTGAAAACAGGTATGGA**  
**CGTGGTGAAAAGACATTGTATTAGCGTGTCAACCTGGCCAGCAGACACC**  
**TCGATGAAC**TGAATACCTTTGTCGAGAAGAATGACGAGGATATGCACCGT****  
**TTTAGTAACGACATAAAGCAAAGCCGATTGAGGTTAAACGGCTGGCTGG**  
**AGAATTATTTGAAGAGCTGAACCTGATGAAAAACAGCTGATGAGCCAAC**  
**TGCGTCCACTCGATCTGGACGATATCCGCCCGTTTATGGACGATGAGTTG**  
**GGATATACAGAAGATGGGGTTGGCTTTAAGCTTCACTGCGCATTAAAGCA**  
**GTCAGTTGATCGCTTTTTCGAACAGTTCGACAGCGGCTCGCAACGCTTAT**  
**CTGATGATA**TACTCGCCAGTTGAGCTCCAGCGAGAGCTTTCTAAGTGGC****  
**TTAGGCGAGGGGGCGTTTCTGTTCTTTAGGCGGGGCTTTAAGGGGGTGTG**  
**GAAAATTAGTCCGGCGACGCTCAAACGACAATTTGGCCGCACGCGATA**  
**CAGATTGGCAAAC**TAAACGGGATATGTCTATAAAATTTAAACCTGGGAGCC****  
**ACCAAATGCGCCGGGAGCATTGCCAAATGGGCAGGTCCTGTGGGTGCAGC**  
**GTTTACGATTGGTCTGATCTATGGGATGCCTATAAAGCACACGAGCGGG**  
4222387 AGCAGGAAC**TGAAAAGAAGTAAAAGCCTCGCTGGCGAAAATCATTAAAGAG**  
**CCGTTTGAAGATATCTATGACGTGCTGAGCTCTGATGAGAAAATGTTGCG**  
**CTTTTTGCTCCGCAGATCCAACAAATGGAGCAGGTTGTTACTGAGCTGG**  
**CAGAGAAAAGT**CAGGCTATTTCGCGACAACCGGCAGAAACTGAGCCTTATT****  
**CAGACGCAGCTTGCACA**ACTAATGGTACCTGCCACAGAAAACCATACTGC****  
**CAGATAGATGCATAATGCAGTTCGGTACACCTGTGGTTGAATAACAGCAG**  
**ACTCTTT**CA**TGATTATCTGGATTGAAAGAATGTCTGCTGCTTATATACGG**  
**AAATATAACTTACTTAACATGAGGCATAAATCAGTGAGATTATTTGTTA**  
**AGGGGCGTTGTTGGAATGATAATGGTCTGGTTGGTTATTTATTTTCGGAAT**  
**GGAATTACTTTTTATCTCCGATCGGGTTCATCCGGTATTAAGAATAATTA**  
4221887 TTGTCCTGGGAATGTTATTCCTGATGATAATGATTGCGGGCGGTATG**TG**  
**CGTTCTCTTCTGTACAGAAAGAAAACATCATGACGTTCTGTTTACGCCG**  
**CTACATTTGTTGGTGGCTTTATGATTATTCAGAATAATGAACTCACCTGTC**  
**GCGGCATGTT**CAGCGACCAGCGGCAGACAGAAATATCGCTTTTACTCAAT****  
**TATTATGAAAATTAATCTTCCGTTTATACACTGGCCGCGGATTTGCAATG**  
**ATAAGCGTGTGTTATCTGTGGCTGCCTTACCCTTTCTAATCTCCTT**  
**GTTTCTCCGGCGTGCATCTGATCTACCGGGTGTATTCTTTATACTGGT**  
**ACTTCTTATATTAAGCAATGAAATCGATTACGTTGCGTGTGATTCTTG**  
**CCTTCCCGTTCACATTACTGACTGCTGCAGATATCAGTATCAGCCTGTAT**  
**TCATGGTGTACATTTGGCACAACATTTAATGATGGTTTTGCAATCAGTAT**  
4221387 CCTTCAGACAGATCCTGATGAAGTAATAAGAATGTT**CAGGATGATGTTG**  
**TTTATGTTATCGCATTATATCTCTTTTATTGTTCTTCTGTTACAGCA**  
**ATAAATAAAACGTCCTCATTTCCATCGGAAAATGTCACGGTAATTACATT**  
**TTTATTGTTAATTACAGTAACGTTATATCTTCTTCCAGTTTGGCTTGA**  
**AGAAAACAGTATCAAATAAATGAAGTTGATCCTTACATAGTCGCTTCCCGG**  
**TTTGCCACATATAACCCCTTTCTTTAATCTGAACTATTTTGCCTGGCCGC**

*leoB*

RBS

*leoA*

terminator?

no RBS ?

*orf5*

```

AAAGGAGCATCAGAGATTAATGACGATTGCTGATACCATACCTCACTACG
ATCTGGTGATTACGGATAACAACACTGACGTATTTGTTCTGGTGATTGGT
GAATCTGCAAGGACTGATAACATGTCCATTTACGGGTATTTCGCGCCCAAC
4220887  CACACCAGAGCTTCAGAAACAGAAATCAGACTGAACTGTTCACTCAGG
CAATCAGCGGGGCACCTTATAACCGCCTTGCGGTACCGCTGGCATTATCT
GCTGATACCGTGCATCATGATGTTGCGCGTTACCCCGATAATATTAT
CAACATGGCGAATCAGGCGGGTTCGATACCTGGTGGCTCAGTTCGCAGT
CCGCTTTCGGGCAGAACCGAACGGCTGTGGCCAGTATCGCCATGCGGGCC
AGAAACAGAATTTATGTCAGAGGCTATGATGAGTTACTTCTCCCACACCT
GGCTGAAGCACCTGAACAGTAATCCGGGGAGCAGGAACTGATTGTTCTGC
ATCTGACGGGCAGCCATGAGCCAGTCTGCAGTAACTGGCCAGAGATAAA
GCCGTGTTTAAACCGCTGGATACAGAAGAAGTCTGCTACGATAATCCAT
TCATTATACCGACAGTTTGTGGGACAGGTTTTTCGCTATGCTGGAAACGC
4220387  GTCGGGCATCCGTCATGTATTTTTTCAGATCACGGTCTGGAGTATGACCCG
ACAAAAGAACATGCCTATTTTCATGGTGAATAAAACCCAGCCAGCAGGC
TTATCATGTTCCGATGTTTATCTGTTACAGCCGACACTGGGAGAGCATG
TCGATCGCCAGACGGTAAACAGCGTTTTTTTCCACTGCGTATAATGATTAT
CTGATTAATGCATGGATGGGCGTAACCAGACCGGCTCAACCGAAAACACC
GGAGGAGGTGATTACCCGCTGGCAGGAAAATCAGATGTTTTTGATGCAA
ATCATAACGTGTTTACTATAACGTATTGCGAAAGAATTTTAATGAGCTC
ATGGAATAATTCGTTAAAGTAATTTACTACGCTATTTGTCAAAGGAAAC
4219887  TTTCAGAAAATAACCCAGGGCGATAACCTGGGGAAGGGGAAGTGTGTTA
TTACTGGTGGATAAATTATTACTTGTGTTGAAAGATACACTAATGCAATAT
CTACTGATGCTGGATGCTTGAGTGTTCATTCCCTGCTGCTGAAAACGGCA
ATATCCAGGGCCAGACATATTCACCGTTAATATTTCTGCATTTCTGTACA

```

*orf5*

terminator?

Numbers refer to NCBI NC\_017633.1, *E. coli* ETEC H10407 complete genome sequence entry (as of March 2013) (Crossman et al., 2010). Start and Stop codons are underlined, putative ribosome binding sites (RBSs) are in bold, putative terminators highlighted in purple, putative promoter highlighted in red. The region between *leoC* and *leoB* was confirmed by re-sequencing of our H10407 strain since it clearly shows the end and beginning of two genes.

**Figure S2. Top:** LeoA-3xFLAG immunofluorescence shows foci predominantly at the poles and in the cell centre. Approximately 250 cells were measured. Foci were measured and placed into 5 bins indicating their localisation within a cell length expressed as a percentage of cell length: for example the 40-50/50-60 bin shows number of foci that were within a band at mid cell (between 40-60 % of cell length). Bottom: field view showing selected and measured cells, demonstrating random selection.

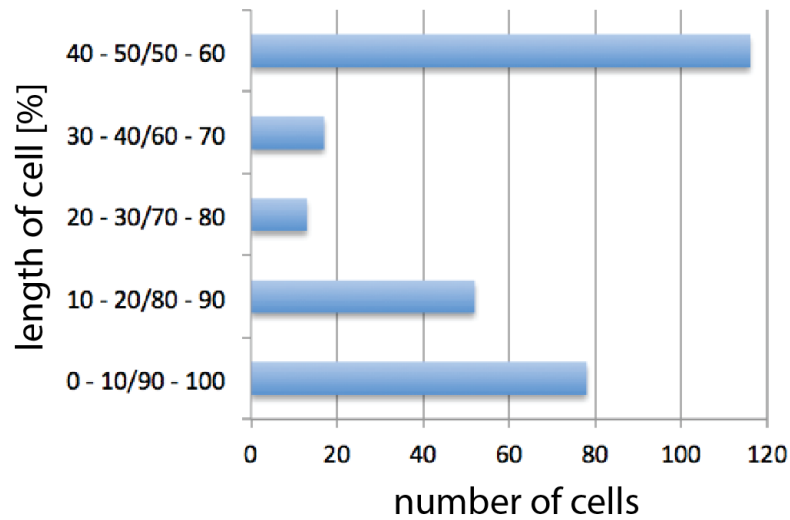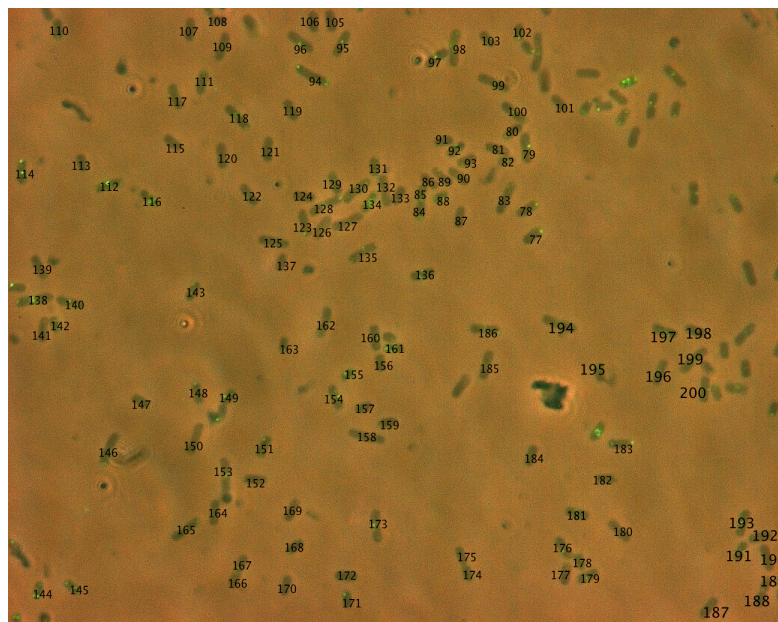

**Figure S3.** LeoA-His<sub>6</sub> does not bind or hydrolyse GTP. A: Equilibrium dialysis. Performed according to Supplementary methods using [ $\alpha$ -<sup>32</sup>P] GTP and dialysis cassettes. B: Radioactive filter binding assay with FtsZ as positive control. C: Colourimetric GTPase assay using malachite green (PiColorlock, Innova Biosciences).

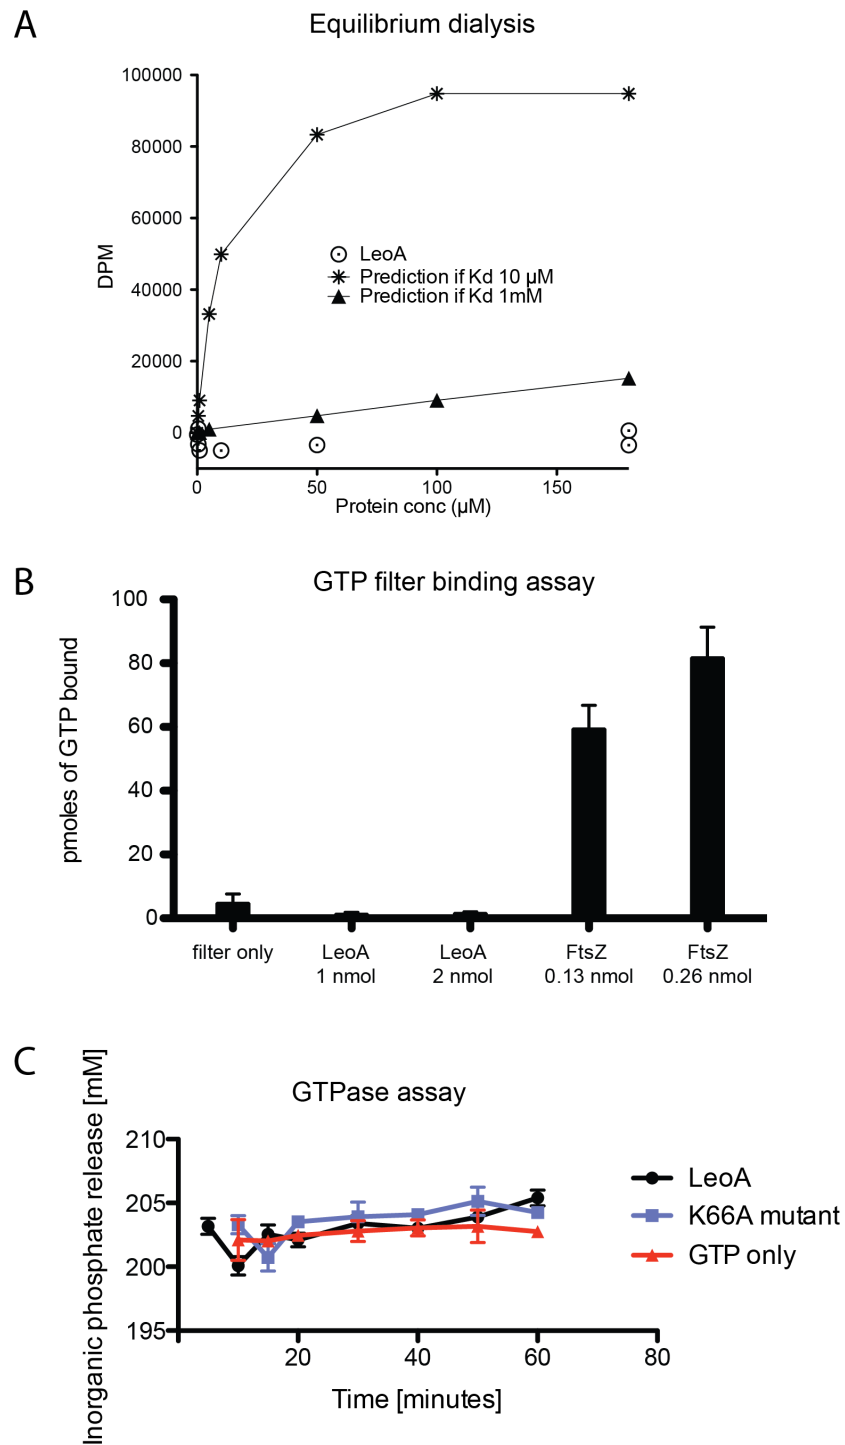

**Figure S4. Deletion of *leoA* has no obvious effects on growth or cell morphology in ETEC.** A: H10407 and H10407 $\Delta$ *leoA* were grown in LB at 37°C. OD<sub>600</sub> were measured every 40 min. and plotted. B: DIC microscopy of both stationary and exponentially growing strains. Size bar = 5  $\mu$ m

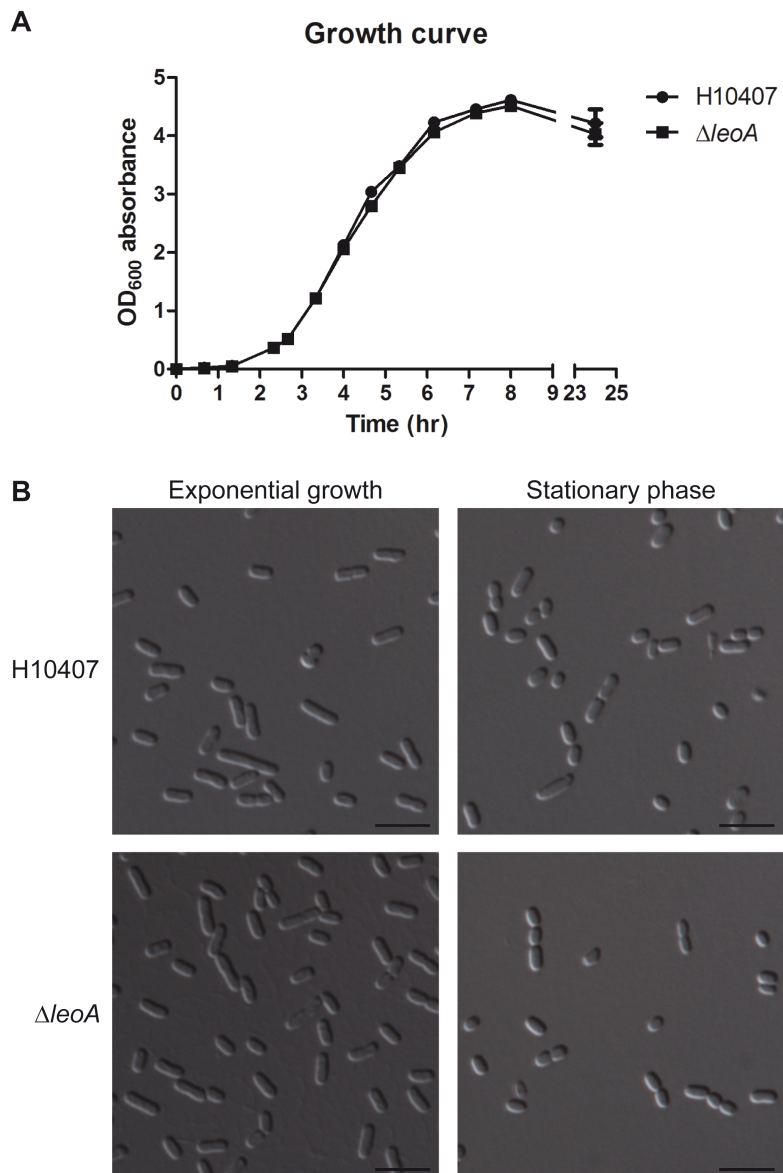

**Figure S5. LeoA periplasmic localisation is not affected by the detection method or deletion of *leoB*.** Top: same experiment as in Figure 4A, but using a 3xFLAG-tagged version of LeoA and an  $\alpha$ -FLAG antibody. (H10407 and H10407LeoA-3xFLAG grown in parallel; protein fractionation as described in methods. Protein loaded on gel, blotted onto membrane, probed first with  $\alpha$ -FLAG antibodies (top blot), stripped and subsequently probed with  $\alpha$ -LeoA antibodies (lower blot). Bottom: H10407 and H10407 $\Delta$ *leoB* knockout mutant were grown in parallel; protein fractionation as described in methods.

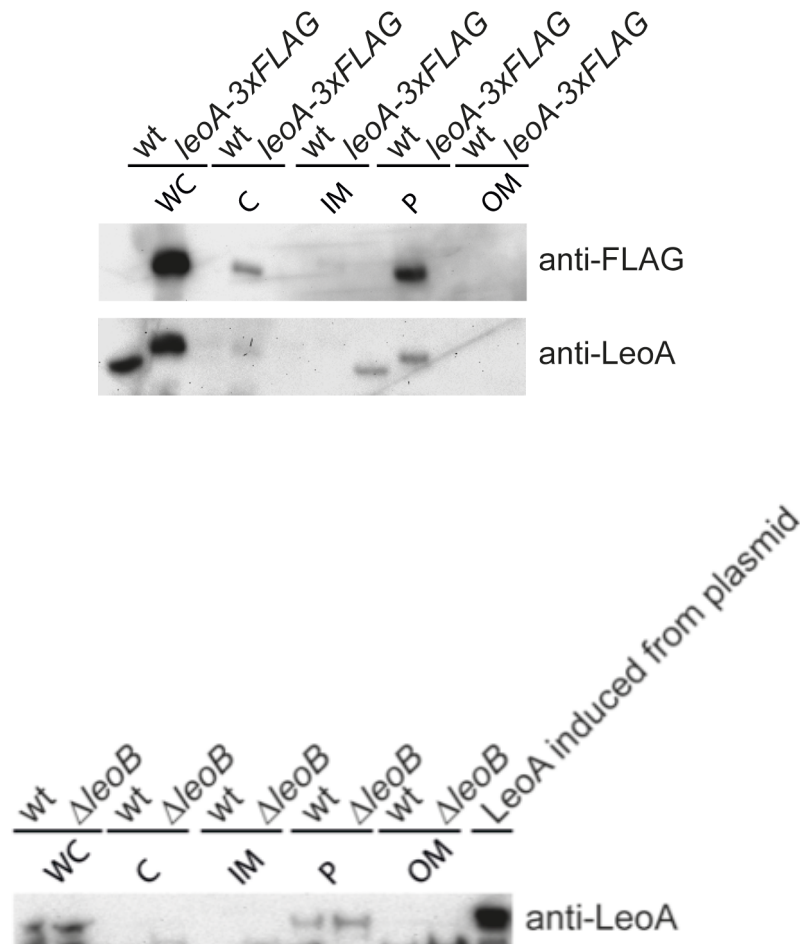



**Figure S6. Western blots and quantification showing Tat-GFP and OmpA levels in *leo* deletion strains and vesicle fractions derived from these. This figure provides the original blots and quantification data used for the quantification as shown in Figure 4D.**

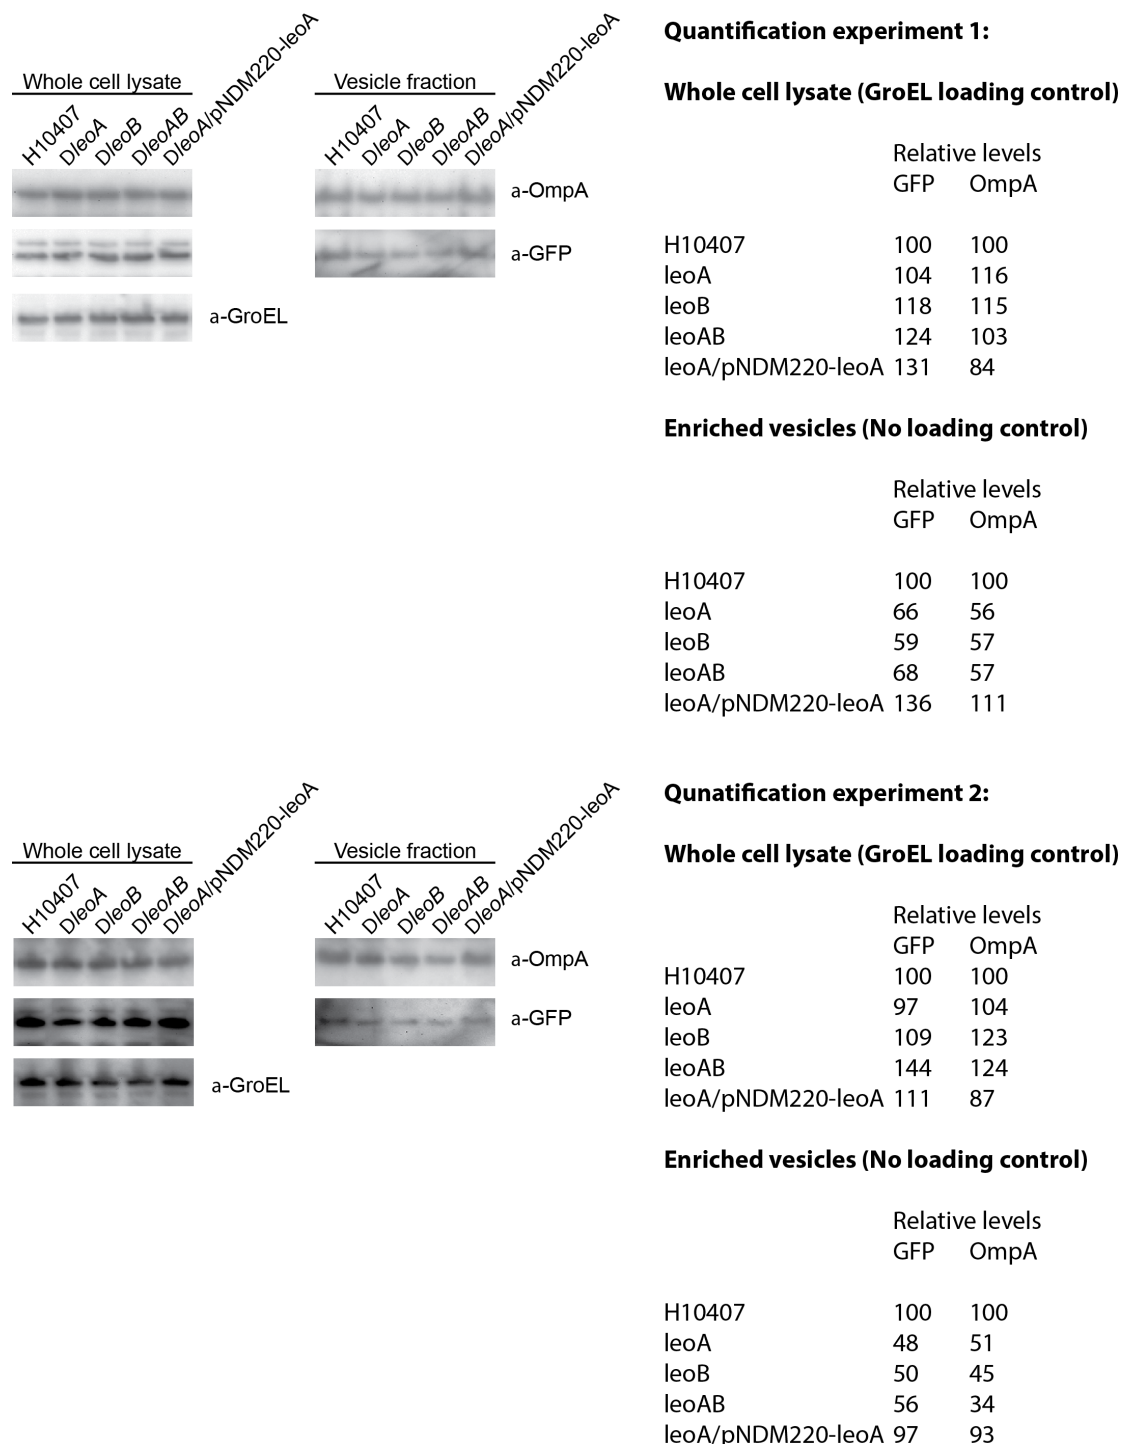



**Table S1: List of strains and plasmids used in this study.**

| Strains/plasmids | Genotype                                                                                                                                                                               | Source/reference                 |
|------------------|----------------------------------------------------------------------------------------------------------------------------------------------------------------------------------------|----------------------------------|
| <u>Strains</u>   |                                                                                                                                                                                        |                                  |
| Top10            | F <sup>-</sup> <i>mcrA</i> Δ( <i>mrr-hsdRMS-mcrBC</i> ) φ80 <i>lacZ</i> ΔM15 Δ <i>lacX74 nupG recA1 araD139 Δ(ara-leu)7697 galE15 galK16 rpsL(Str<sup>R</sup>) endA1 λ<sup>-</sup></i> | Invitrogen                       |
| BL21-AI          | F <sup>-</sup> <i>ompT hsdS<sub>B</sub> (r<sub>B</sub><sup>-</sup> m<sub>B</sub><sup>-</sup>) gal dcm araB::T7RNAP-tetA</i>                                                            | Invitrogen                       |
| H10407           | O78:H11:K80                                                                                                                                                                            | (Evans, Jr. and Evans 322-28)    |
| AB109            | H10407 <i>leoA</i> 3xFLAG                                                                                                                                                              | This work                        |
| AB110            | H10407Δ <i>leoA</i>                                                                                                                                                                    | This work                        |
| AB111            | H10407Δ <i>leoB</i>                                                                                                                                                                    | This work                        |
| AB112            | H10407Δ <i>leoAB</i>                                                                                                                                                                   | This work                        |
| AB113            | H10407/pAB107                                                                                                                                                                          | This work                        |
| AB114            | H10407Δ <i>leoA</i> /pAB107                                                                                                                                                            | This work                        |
| AB115            | H10407Δ <i>leoB</i> /pAB107                                                                                                                                                            | This work                        |
| AB116            | H10407Δ <i>leoAB</i> /pAB107                                                                                                                                                           | This work                        |
| AB117            | H10407Δ <i>leoA</i> /pAB107/pAB108                                                                                                                                                     | This work                        |
| <u>Plasmids</u>  |                                                                                                                                                                                        |                                  |
| pKD46            | λ-Red expression vector, <i>Rep<sup>ts</sup>, Amp<sup>R</sup></i>                                                                                                                      | (Datsenko and Wanner 6640-45)    |
| pKD3             | Template plasmid containing an FRT-flanked chloramphenicol resistance gene                                                                                                             | (Datsenko and Wanner 6640-45)    |
| pCP20            | FLP recombinase expression, <i>Rep<sup>ts</sup>, Amp<sup>R</sup>, Cml<sup>R</sup></i>                                                                                                  | (Datsenko and Wanner 6640-45)    |
| pSUB11           | Plasmid with a 24 nt 3xFLAG sequence and FRT sites flanking a kanamycin resistance cassette                                                                                            | (Uzzau et al. 15264-69)          |
| pAB107           | <i>torA-gfp</i> in pXG-10                                                                                                                                                              | This work                        |
| pAB108           | <i>IPTG indicible leoA</i> in pNDM220                                                                                                                                                  | This work                        |
| pXG-10           | pSC101 derivative, constitutive P <sub>LetO</sub> promoter                                                                                                                             | (Urban and Vogel 1018-37)        |
| pNDM220          | Mini-R1, <i>bla, LacIq, PA1/O4/O3</i>                                                                                                                                                  | (Gottfredsen and Gerdes 1065-76) |
| pHLLeoA          | LeoA in <i>phis17</i> with N-terminal hexahistidine tag                                                                                                                                | This work                        |
| pKM100           | <i>leoC-leoB -leoA</i> in <i>phis17</i>                                                                                                                                                | This work                        |
| phis17           | Bruno Miroux, MRC-LMB personal communication                                                                                                                                           |                                  |

**Table S2: List of oligonucleotides used in this study.**

| Primer name | Sequence                                                                                        |
|-------------|-------------------------------------------------------------------------------------------------|
| JMJ91       | ATGGAACAATTCAAACAGTTCAGTTATTGAAAAACAGGCTGCGATTAACCTCGTGTAGGCTGGAG<br>CTGCTTCG                   |
| JMJ92       | CTATCTGGCAGTATGGTTTTCTGTGGCAGGTACCATTAGTTGTGCAAGCTCATATGAATATCCT<br>CCTTAGTTCC                  |
| JMJ101      | CTCTCGACAGCGTTGCCGATG                                                                           |
| JMJ102      | CTCACTGATTTATGCCTCATG                                                                           |
| JMJ134      | GAAACTGAGCCTTATTCAGACGCAGCTTGCACAACATAATGGTACCTGCCACAGAAAACCATACT<br>GCCAGAGACTACAAAGATGACGACGA |
| JMJ135      | GTGTTAAGTAAGTTATATTTCCGATAATAAGCAGCAGACATTCTTTCAATCCAGATAATCATGA<br>AAGAGTCATATGAATATCCTCCTTAG  |
| JMJ205      | GCCTGACGTCGGCAAAAAGAGTGTGACTTGTGAGCGGATAACAATGATACTTAGATTCATGGA<br>ACAATTCAAACAGTTCAGTA         |
| JMJ206      | CCCCGGATCCCTATCTGGCAGTATGGTTTTCTGTG                                                             |
| JMJ238      | atgagtgatacatgggtcttctgtagaggagaaatccggagcgggtattcagggatactcacgtgt<br>aggctggagctgcttcg         |
| JMJ239      | AAGGCATGCCCTCCAGTTGTTTTTTAATGTTGTGATTTGACTGATTTGTGTTTTCGAAAACATA<br>TGAATATCCTCCTTAGTTCC        |
| JMJ240      | TAATATTTCTGTCTATTATTGTTG                                                                        |
| JMJ246      | CGCTAATGAAAGTCAGTCTCGTTTGCAAATTT                                                                |
| JMJ247      | AACGCCCTTAACAATAATCTCAC                                                                         |
| JMJ256      | tagcATGCAT GCAAATGAATGCGTCTGACACC                                                               |
| JMJ257      | tagcGCTAGC CGCCGCTTGCGCCGAGTCGC                                                                 |
| JVO-155     | CCGTATGTAGCATCACCTTC                                                                            |
| pZE-CAT     | TGGGATATATCAACGGTGGT                                                                            |
| KM223       | GGAATTCCATATGGATGTGAACAGGGCACAATG                                                               |
| KM225       | GCGAGATCTCTATCTGGCAGTATGGTTTTTC                                                                 |

**Supporting Information References**

Crossman, L. C., Chaudhuri, R. R., Beatson, S. A., Wells, T. J., Desvaux, M., Cunningham, A. F., Petty, N. K., Mahon, V., Brinkley, C., Hobman, J. L., Savarino, S. J., Turner, S. M., Pallen, M. J., Penn, C. W., Parkhill, J., Turner, A. K., Johnson, T. J., Thomson, N. R., Smith, S. G., and Henderson, I. R. (2010). A commensal gene bad: complete genome sequence of the prototypical enterotoxigenic *Escherichia coli* strain H10407. *J. Bacteriol.* 192, 5822-5831.

Datsenko KA, Wanner BL: One-step inactivation of chromosomal genes in *Escherichia coli* K-12 using PCR products. *Proc Natl Acad Sci U S A* 2000, 97:6640-6645.

Evans, D. J., Jr. and D. G. Evans. "Three characteristics associated with enterotoxigenic *Escherichia coli* isolated from man." *Infect.Immun.* 8.3 (1973): 322-28.

Gotfredsen, M. and Gerdes, K. (1998) *Mol. Microbiol.* 29, 1065-1076

Urban, J. H. and J. Vogel. "Translational control and target recognition by *Escherichia coli* small RNAs in vivo" *Nucleic Acids Res.* 35.3 (2007): 1018-37.

Uzzau S, Figueroa-Bossi N, Rubino S, Bossi L: Epitope tagging of chromosomal genes in *Salmonella*. *Proc Natl Acad Sci U S A* 2001, 98:15264-15269.
